# Supplementary material
Source: publisher site journal article supplement (https://www.kjim.org/upload/media/kjim-2022-072-suppl13.pdf)
Supplement: Supplementary file 1 [file kjim-2022-072-suppl13.pdf]

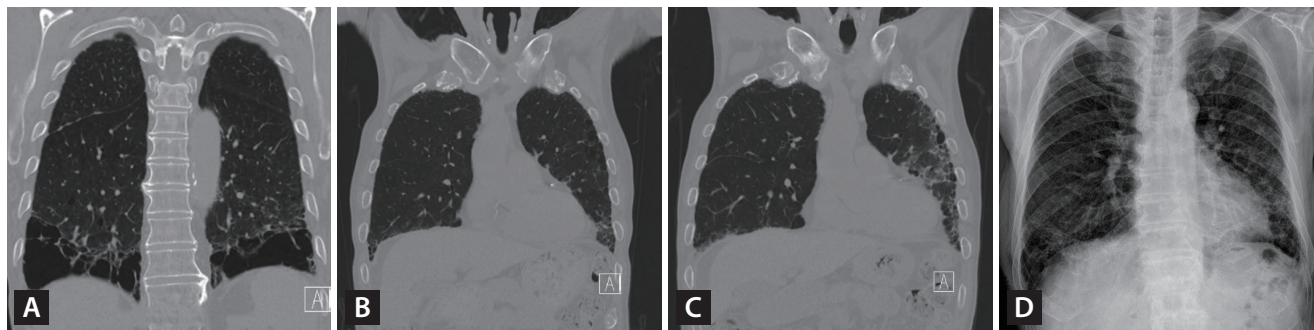

**Supplementary Figure 9.** Radiologic findings of patient #10 before and after coronavirus disease 2019 (COVID-19) vaccination (first dose of BNT162b2-mRNA vaccine). (A, B) Seven months prior to onset. (C) COVID-19 vaccine-related pneumonitis (CV-P). (D) One month after CV-P.
